# Supplementary material for: Down-regulation of STAT3 enhanced chemokine expression and neutrophil recruitment in biliary atresia
Source: Oxford University Press journal article supplement (doi:10.1042/cs20201366), 2021-03-26
Supplement: cs-2020-1366_supp.pdf [file cs-2020-1366_supp.pdf]

**Supplementary figure 1**

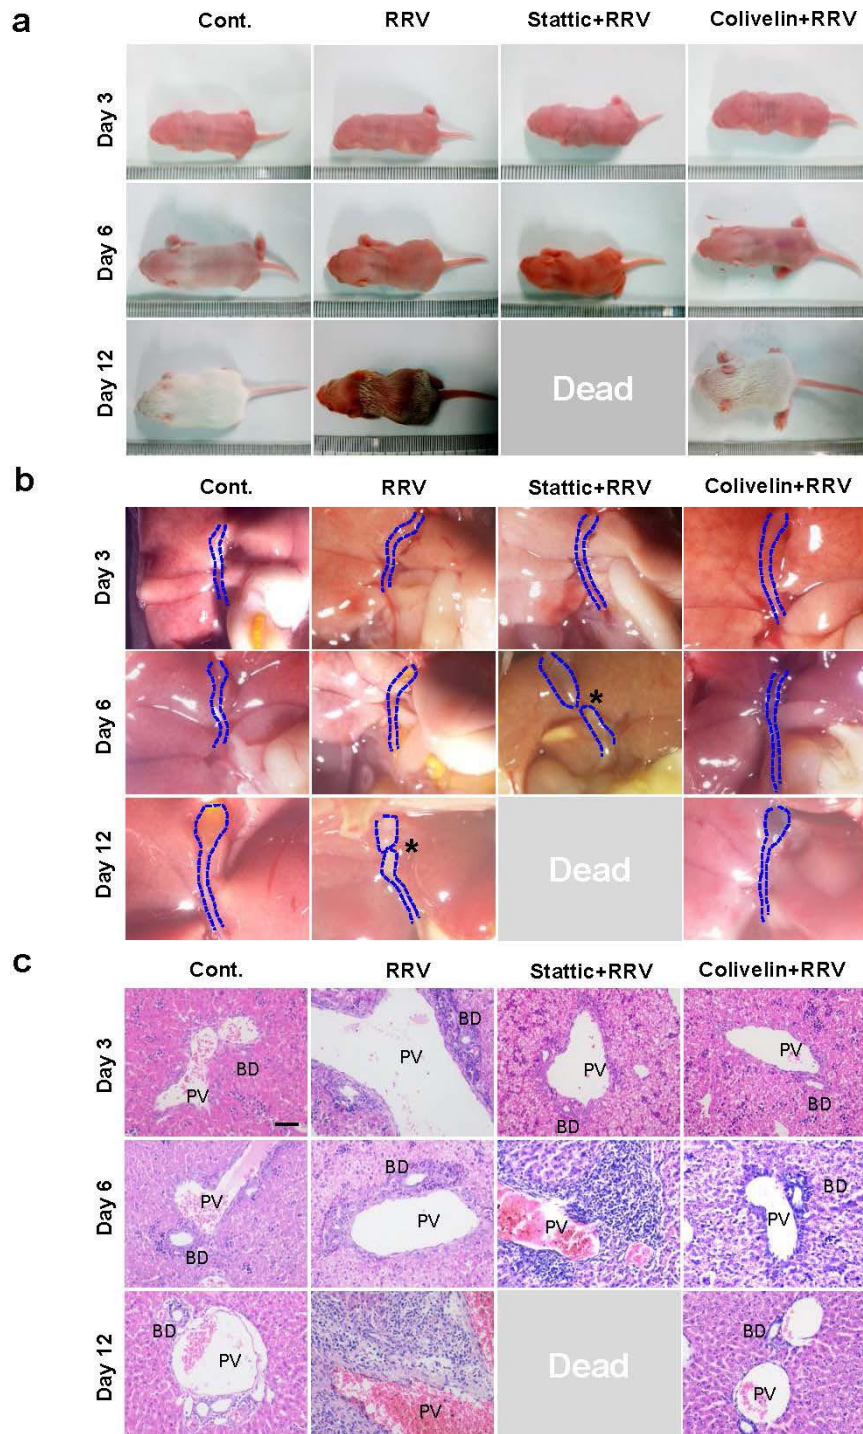

**Supplementary figure 1** Effect of STAT3 inhibition or activation on a mouse model of biliary atresia on days 3, 6 and 12. The STAT3 inhibitor Stattic (25  $\mu\text{g/g}$  body weight) or the activator Colivelin (1  $\mu\text{g/g}$  body weight) was given 4 hours before RRV inoculation. **a** Effects of Stattic and Colivelin on BA syndrome. Photographs of the mice were taken on days 3, 6 and 12 after RRV inoculation. **b** Photographs of the portal area after dissection

under a dissecting microscope. Cholangiography was achieved by injection of 0.4% methylene blue. The blue line shows the outline of the gallbladder and bile duct. The asterisks depict BA. **c** HE staining revealing the hepatic bile ducts and cellular infiltration in the Stattic and Colivelin treatment groups. The scale bar represents 50  $\mu\text{m}$ . BD, bile duct; PV, portal vein.

Supplementary figure 2

Suppl. Fig. 2

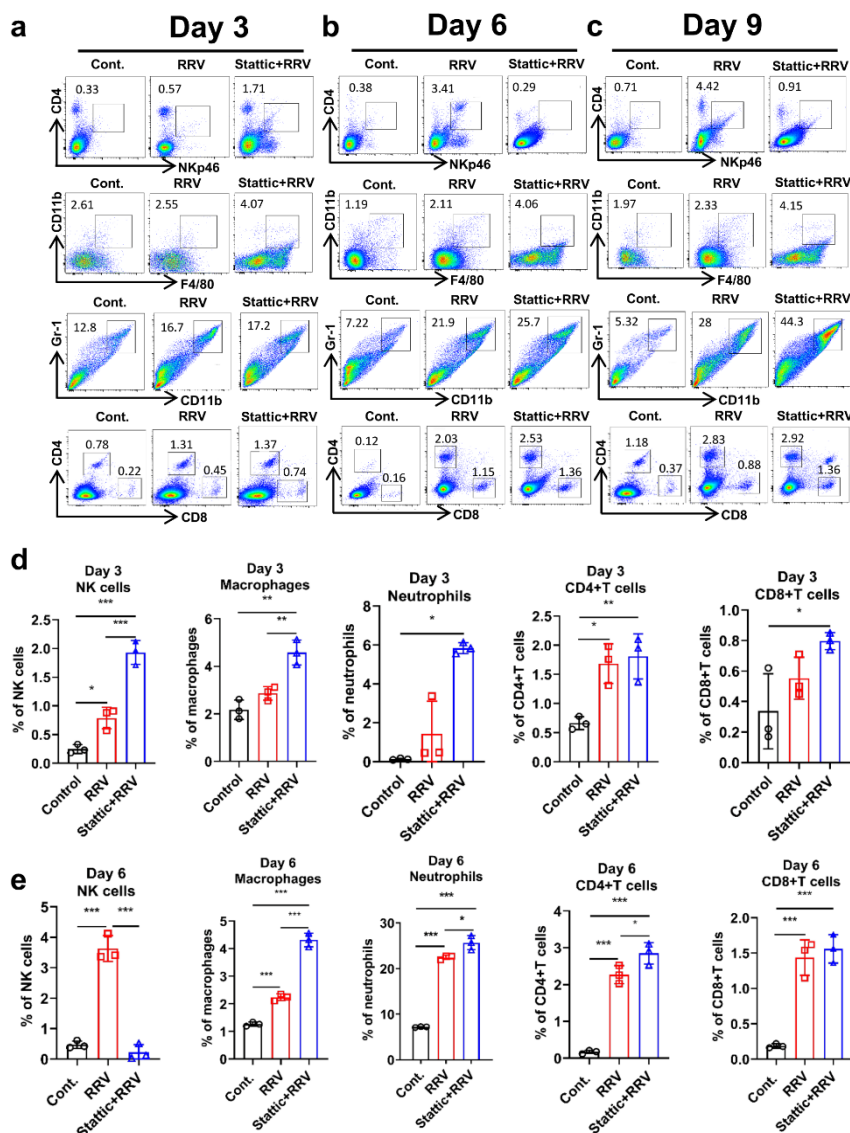

**Supplementary figure 2** Effects of STAT3 inhibition on hepatic immune cell regulation on days 3 and 6 after RRV inoculation, and comparison of neutrophils in different neonatal diseases. **a, b and c** STAT3 inhibition induced changes in NK cell, macrophage, neutrophil, CD4+ T cell and CD8+ T cell numbers in the liver as measured by flow cytometry. Cell suspensions were obtained from the liver at the end of experiments and labelled with appropriate antibodies for immune cell analysis. At least three sets of experiments were performed, and one representative set of results is presented here. Data were obtained on days 3 (**a**), 6 (**b**) and 9 (**c**) after

RRV inoculation. **d and e** Data were collected and on days 3 (**d**) and 6 (**e**) after RRV inoculation and evaluated by statistical analysis. \*P<0.05, \*\*P<0.01, \*\*\*P<0.001.

### Supplementary figure3

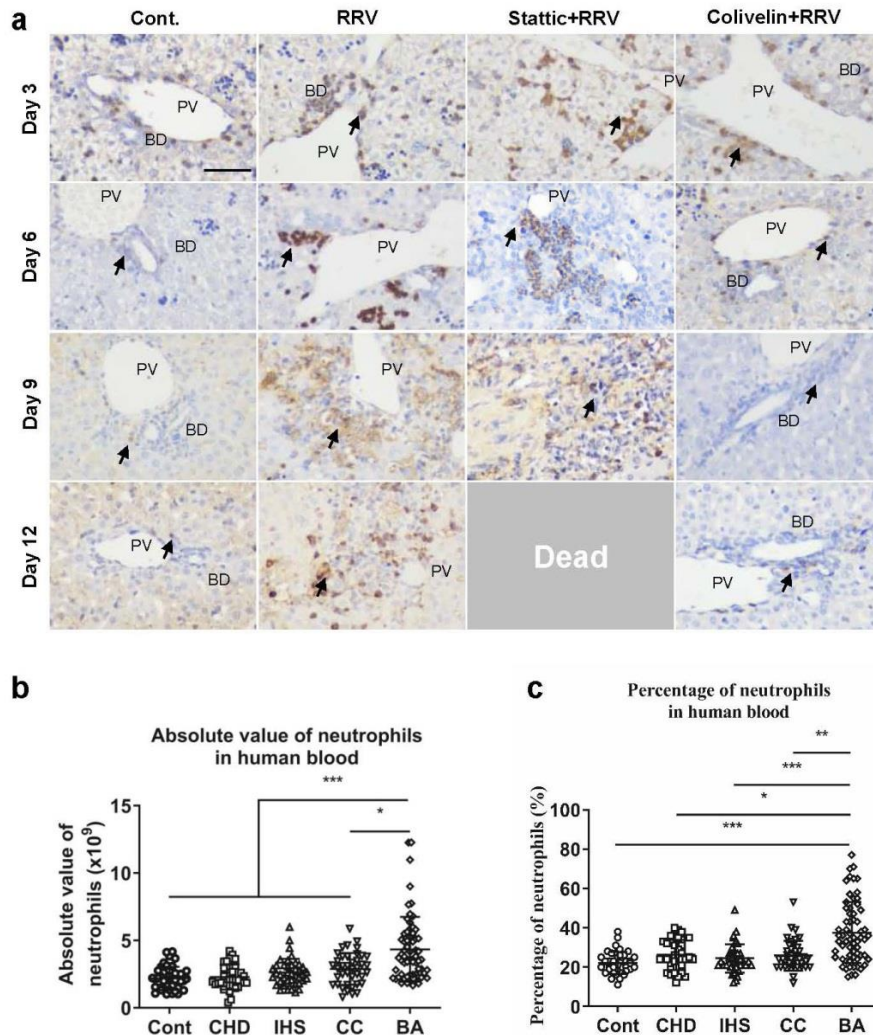

**Suppl. Fig. 3.** Effects of STAT3 inhibition or activation on neutrophil accumulation and the content of neutrophil in human peripheral blood. **a** Effects of STAT3 inhibition or activation on neutrophil accumulation determined by immunohistochemical staining on days 3, 6, 9 and 12 after RRV inoculation. BD, bile duct; PV, portal vein; the black arrows represent neutrophils; the scale bar represents 50  $\mu$ m. **b** Absolute value of neutrophils from clinical analysis of the peripheral blood of BA patients compared with that of patients with other neonatal diseases: Cont., healthy control (n=40); CHD, congenital heart disease (n=35); IHS, infant hepatitis syndrome (n=40); CC (n=40); and BA (n=63). \*P<0.05, \*\*\*P<0.001. **c** Percentages of neutrophils in the peripheral blood for the same patient populations. \*P<0.05, \*\*P<0.01, \*\*\*P<0.001.

## Supplementary figure4

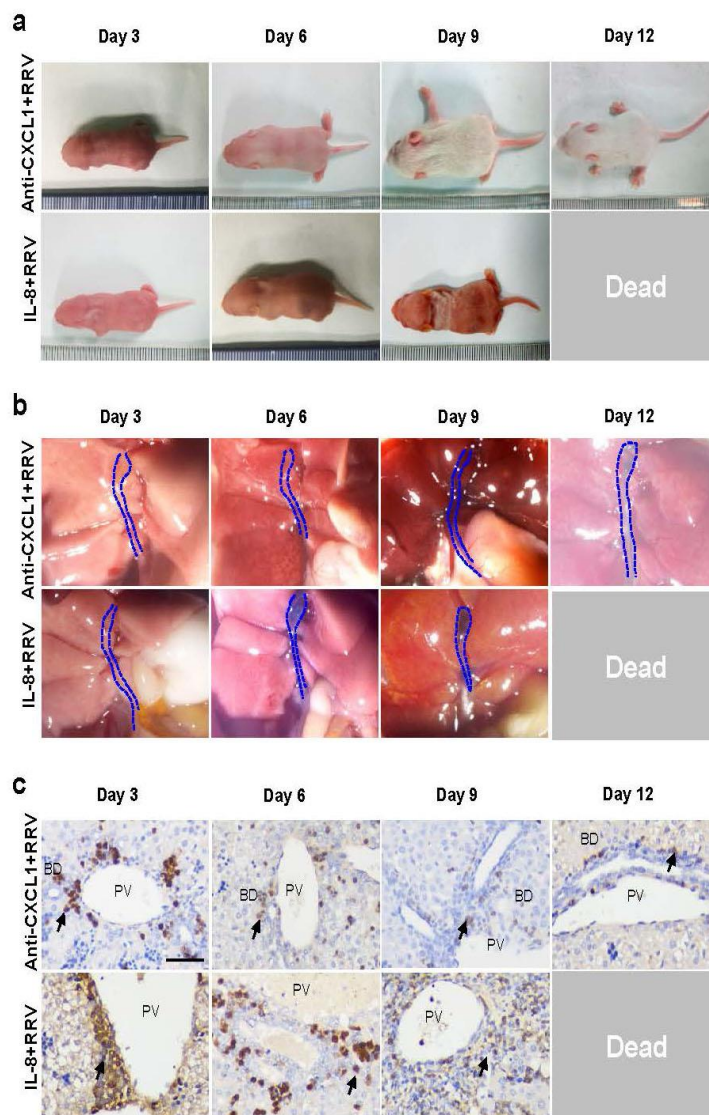

**Supplementary figure 4** Administration of an antibody against the chemoattractant CXCL1 or human recombinant IL-8 to BA model mice. **a** Morphological changes on days 3, 6, 9 and 12 after RRV inoculation in BA model mice after administration of anti-CXCL1 and anti-IL-8 antibodies. **b** Photographs of portal area changes in the treatment groups mentioned above. Cholangiography was achieved by injection of 0.4% methylene blue. The blue line shows the outline of the gallbladder and bile duct. **c** Changes in neutrophils in the liver in the test and control groups detected by immunohistochemical staining. The black arrows represented neutrophil. The scale bar represents 50  $\mu$ m. BD, bile duct; PV, portal vein.

## Supplementary figure 5

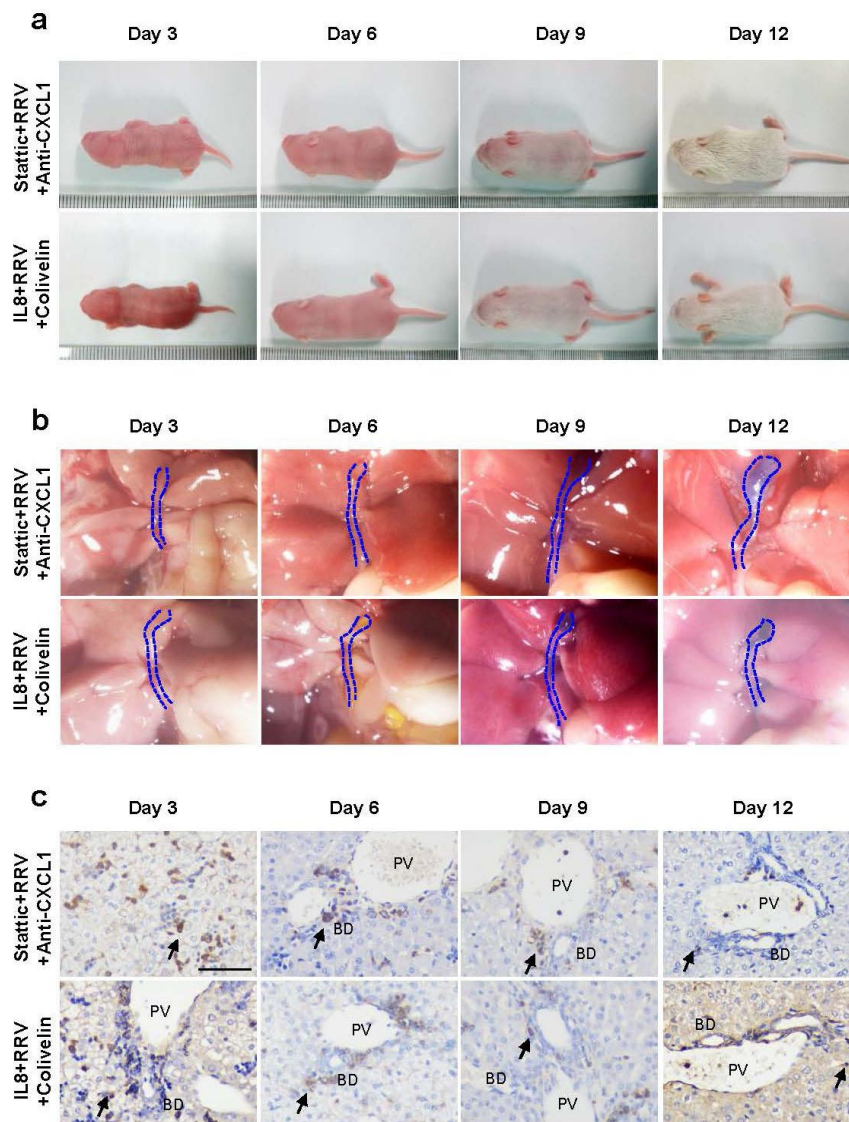

**Supplementary figure 5** Combined treatments of the anti-CXCL1 antibody/STAT3 inhibitor Stattic and human recombinant IL-8/the STAT3 activator Colivelin in the BA mouse model. **a** Changes in morphology in BA mice in response to treatment with either the anti-CXCL1 antibody combined with the STAT3 inhibitor or recombinant IL-8 combined with the STAT3 activator Colivelin on days 3, 6, 9 and 12 after RRV inoculation. **b** Photographs of the portal areas in the treatment groups mentioned above. Cholangiography was achieved by injection of 0.4% methylene blue. The blue line shows the outline of the gallbladder and bile duct. **c** Changes in neutrophils in the liver as measured by immunohistochemical staining. The black arrows represented neutrophil. The scale bar represents 50  $\mu$ m. BD, bile duct; PV, portal vein.

## Supplementary figure 6

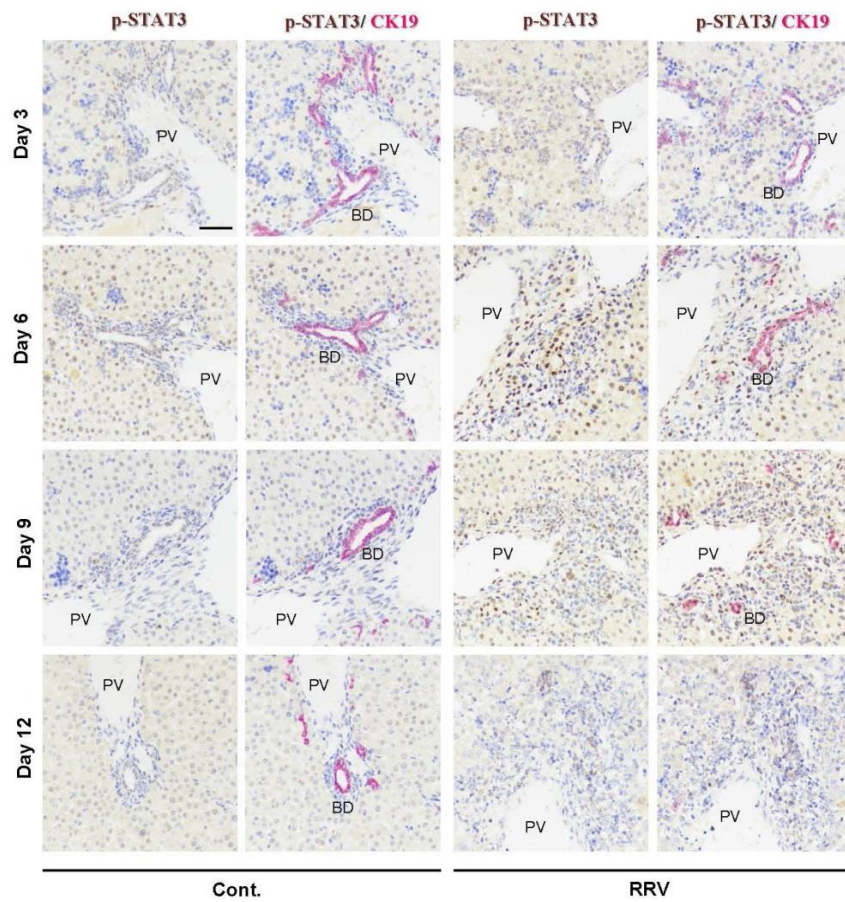

**Supplementary figure 6** The effect of STAT3 activation on a BA mouse model. Immunohistochemical double staining for p-STAT3 was performed in BA model mice on days 3, 6, 9 and 12. Brown and pink color indicated p-STAT3 and CK19 for bile duct. The scale bar represents 100  $\mu\text{m}$ .



**Supplementary figure 7**

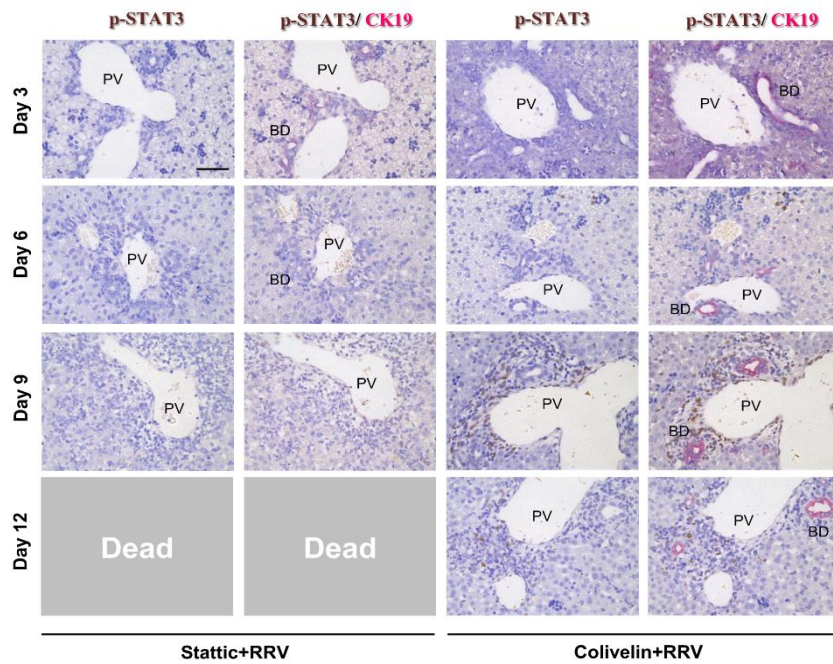

**Supplementary figure 7** The effect of STAT3 activator and inhibitor on a BA mouse model. Immunohistochemical double staining for p-STAT3 was performed in BA model mice on days 3, 6, 9 and 12. Brown and pink color indicated p-STAT3 and CK19 for bile duct. The scale bar represents 100  $\mu$ m.

Supplementary figure8

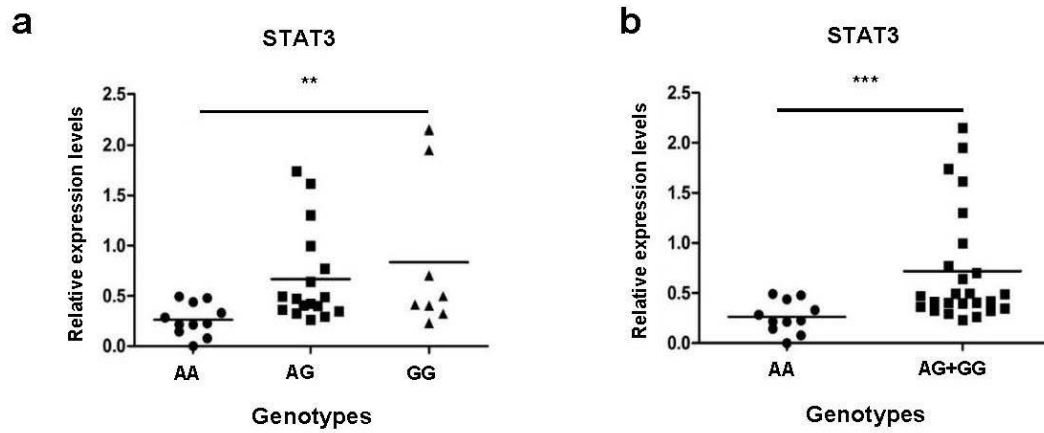

**Supplementary figure 8** Genetic association and expression of STAT3 in biliary atresia. **a and b** Expression of STAT3 in patients with the risk genotype (AA) of SNP rs7211777 was compared to that in patients with the GG or AG genotype, and statistical significance was evaluated (n=8-15 for each genotype).

**Supplementary table 1: Reagents/antibodies used in the experiments**

| <b>Reagents/antibody</b>  | <b>Reactivity</b> | <b>Company</b>           | <b>Catalogue # (Lot #)</b> | <b>Dilution</b> |
|---------------------------|-------------------|--------------------------|----------------------------|-----------------|
| CK19                      | Human             | Santa Cruz Biotechnology | sc-376126 (K2613)          | 1:100           |
| Ck19                      | Mouse             | Abcam                    | ab133496 (GR3271,57-2)     | 1:200           |
| STAT3                     | Human / mouse     | Cell Signalling          | 9139S                      | 1:600           |
| p-STAT3                   | Human / mouse     | Cell Signalling          | 9145S                      | 1:400           |
| p-STAT3                   | Human             | Abcam                    | ab30647                    | 1:50            |
| CXCL1                     | Human / mouse     | Abcam                    | ab86436                    | 1:250           |
| CD11b-FITC                | Mouse             | Thermo Fisher Scientific | 11-0112-82                 | 1:100           |
| Gr-1-PE                   | Mouse             | Thermo Fisher Scientific | 12-5931-82                 | 1:100           |
| Gr-1-FITC                 | Mouse             | Thermo Fisher Scientific | 11-5931-82                 | 1:100           |
| Ly6G-PE                   | Mouse             | Thermo Fisher Scientific | 12-9668-82                 | 1:100           |
| Ly6C-PerCP-Cyanine5.5     | Mouse             | Thermo Fisher Scientific | 45-5932-82                 | 1:100           |
| CD4-PerCP-Cyanine5.5      | Mouse             | Thermo Fisher Scientific | 45-0042-82                 | 1:100           |
| CD3e-Alexa Fluor 488      | Mouse             | Thermo Fisher Scientific | 53-0031-82                 | 1:100           |
| CD8a-APC                  | Mouse             | Thermo Fisher Scientific | 17-0081-82                 | 1:100           |
| MHC-II-PE                 | Mouse             | Thermo Fisher Scientific | 12-5321-82                 | 1:100           |
| F4/80 -APC                | Mouse             | Thermo Fisher Scientific | 17-4801-82                 | 1:100           |
| CD11c -PE                 | Mouse             | Thermo Fisher Scientific | 12-0114-82                 | 1:100           |
| STAT3 inhibitor (Stattic) | Mouse             | Santa Cruz Biotechnology | sc-202818                  | -               |

|                             |       |                          |           |   |
|-----------------------------|-------|--------------------------|-----------|---|
| STAT3 activator (Colivelin) | Mouse | Santa Cruz Biotechnology | sc-361153 | - |
| Recombinant IL-8            | human | BioLegend                | 574206    | - |
| Anti-CXCL1 antibody         | Mouse | Thermo Fisher Scientific | 48415     | - |

---

**Supplementary Table 2: Demographic and Clinical Characteristics of the Study population**

| <b>Variable</b>               | <b>Choledochal cysts (CC, n=20)</b> | <b>Biliary atresia (BA, n=28)</b> |
|-------------------------------|-------------------------------------|-----------------------------------|
| Age (days)                    | 272.5 (92, 1640)                    | 78.5 (70, 89.5)                   |
| Males, n (%)                  | 3(15%)                              | 16(57.14%)                        |
| Females, n (%)                | 17(85%)                             | 12(42.86%)                        |
| Underlying disease, n (%)     |                                     |                                   |
| Thalassemia                   | 0(0)                                | 1(3.57%)                          |
| Congenital intestinal atresia | 0(0)                                | 1(3.57%)                          |
| Acute pancreatitis            | 1(5%)                               | 0(0)                              |
| Hernia                        | 1(5%)                               | 3(10.71%)                         |
| DBIL (umol/L)                 | 45.32±55.74                         | 137.3±48.1                        |
| TBIL (umol/L)                 | 64.28±67.79                         | 153.9±60.07                       |
| GGT (U/L)                     | 612.8±809.3                         | 772.8±598.6                       |
| Total bile acid (umol/L)      | 80.31±126.2                         | 178±82.31                         |

Age: median(25% percentile, 75% percentile)

**Supplementary Table 3: Expression of STAT3 in Gr-1+ and it's sub clusters.**

|                          | NC                |                   | RRV               |                   |
|--------------------------|-------------------|-------------------|-------------------|-------------------|
|                          | Ly6G <sup>+</sup> | Ly6C <sup>+</sup> | Ly6G <sup>+</sup> | Ly6C <sup>+</sup> |
| Total Cell Number        | 3608              | 973               | 2631              | 1122              |
| STAT3 <sup>+</sup> cells | 270               | 146               | 138               | 117               |
| %                        | 7.5%              | 15.0%             | 5.2%              | 10.4%             |

**Supplementary Table 4: The association of SNP rs7211777 in STAT3 with BA susceptibility using 503 cases and 495 controls.**

| CHR | SNP       | BP       | A1/A2 | TEST     | Patients   | Controls    | OR (CI 0.95)    | P        |
|-----|-----------|----------|-------|----------|------------|-------------|-----------------|----------|
|     |           |          |       | DOM      | 389/69     | 375/107     | 1.61(1.15~2.25) | 5.31E-03 |
| 17  | rs7211777 | 42382057 | A/G   | REC      | 155/303    | 160/322     | 1.03(0.79~1.35) | 0.833    |
|     |           |          |       | ADD      | 544/372    | 535/429     | 1.23(1.02~1.48) | 0.033    |
|     |           |          |       | GENO_2DF | 155/234/69 | 160/215/107 | NA              | 0.015    |

CHR: Chromosome; SNP: Single nucleotide polymorphism; BP: Base Pair; A1/A2: Allele1/Allele2; TEST: test of genetic model; Patients: genotype/allele numbers in patients; Control: genotype/allele numbers in controls; OR: Odds Ratio; CI: Confident Interval; P: P value of disease association.
